# Supplementary material for: Drainage Practice of Rice Paddies as a Sustainable Agronomic Management for Mitigating the Emission of Two Carbon-Based Greenhouse Gases (CO2 and CH4): Field Pilot Study in South Korea
Source: MDPI journal article supplement (doi:10.3390/su16072802), 2024-03-28
Supplement: s1 [file s1]

## **Supplementary Materials**

### **Effect of drainage practice on the emission of two carbon-based greenhouse gases (CO<sub>2</sub> and CH<sub>4</sub>) from paddy system in South Korea: field pilot study**

#### **List of Contents**

**Table S1.** Method and timing of farming practices in the experiment field under continuous flooding and intermittent drainage.

**Figure S1.** The components of the CO<sub>2</sub> and CH<sub>4</sub> flux measuring system (not to scale).

**Figure S2.** Changes in air temperature and precipitations during the rice growing season.

**Figure S3.** Pourbaix diagrams of Fe and S (25 °C) system. The pH and Eh values measured in BG and MG pots containing magnetite are plotted in (a), and the pH and Eh values measured in JS pot containing ferrihydrite are plotted in (b) under the condition of intermittent drainage.

**Figure S4.** Changes of soil wetness (v/v, %) measured at the in the depth of 5 cm from the soil surface. For the treatment of intermittent drainage, soil wetness at the 15 cm depth was also determined.

**Table S1.** Method and timing of farming practices in the experiment field under continuous flooding and intermittent drainage.

| Farming Practices \ Irrigation Methods | Continuous Flooding                                                                                                                                                                                                                              | Intermittent Drainage                                                                                                                                                                                                                                                                                |
|----------------------------------------|--------------------------------------------------------------------------------------------------------------------------------------------------------------------------------------------------------------------------------------------------|------------------------------------------------------------------------------------------------------------------------------------------------------------------------------------------------------------------------------------------------------------------------------------------------------|
| Fertilizer Application                 | 70 kg N ha <sup>-1</sup> at May 12 <sup>th</sup>                                                                                                                                                                                                 |                                                                                                                                                                                                                                                                                                      |
| Irrigation Period                      | May 12 <sup>th</sup> to August 10 <sup>th</sup>                                                                                                                                                                                                  |                                                                                                                                                                                                                                                                                                      |
| Rice Transplanting                     | Thirty-day old seedlings (3–4 plants per hill) of rice ( <i>Oryza sativa</i> L., Japonica) were transplanted with spacing of 25 cm × 25 cm by hand.                                                                                              |                                                                                                                                                                                                                                                                                                      |
| Cultivation Period                     | May 16 <sup>th</sup> (transplant) to Sep. 17 <sup>th</sup> (harvest)                                                                                                                                                                             |                                                                                                                                                                                                                                                                                                      |
| Flooding and Drainage                  | Paddy pot was flooded with 1–2 cm water until the rice plant attains the three-leaf stage (May 30 <sup>th</sup> ); and then, the pot was continuously flooded with 5–7 cm water depth; the pot was permanently drained 38 days prior to harvest. | Paddy pot was flooded with 1–2 cm water until the rice plant attains the three-leaf stage (May 30 <sup>th</sup> ); and then, the pot was flooded with 5–7 cm water depth and drained after 11 days. The practice was repeated three times. The pot was permanently drained 38 days prior to harvest. |

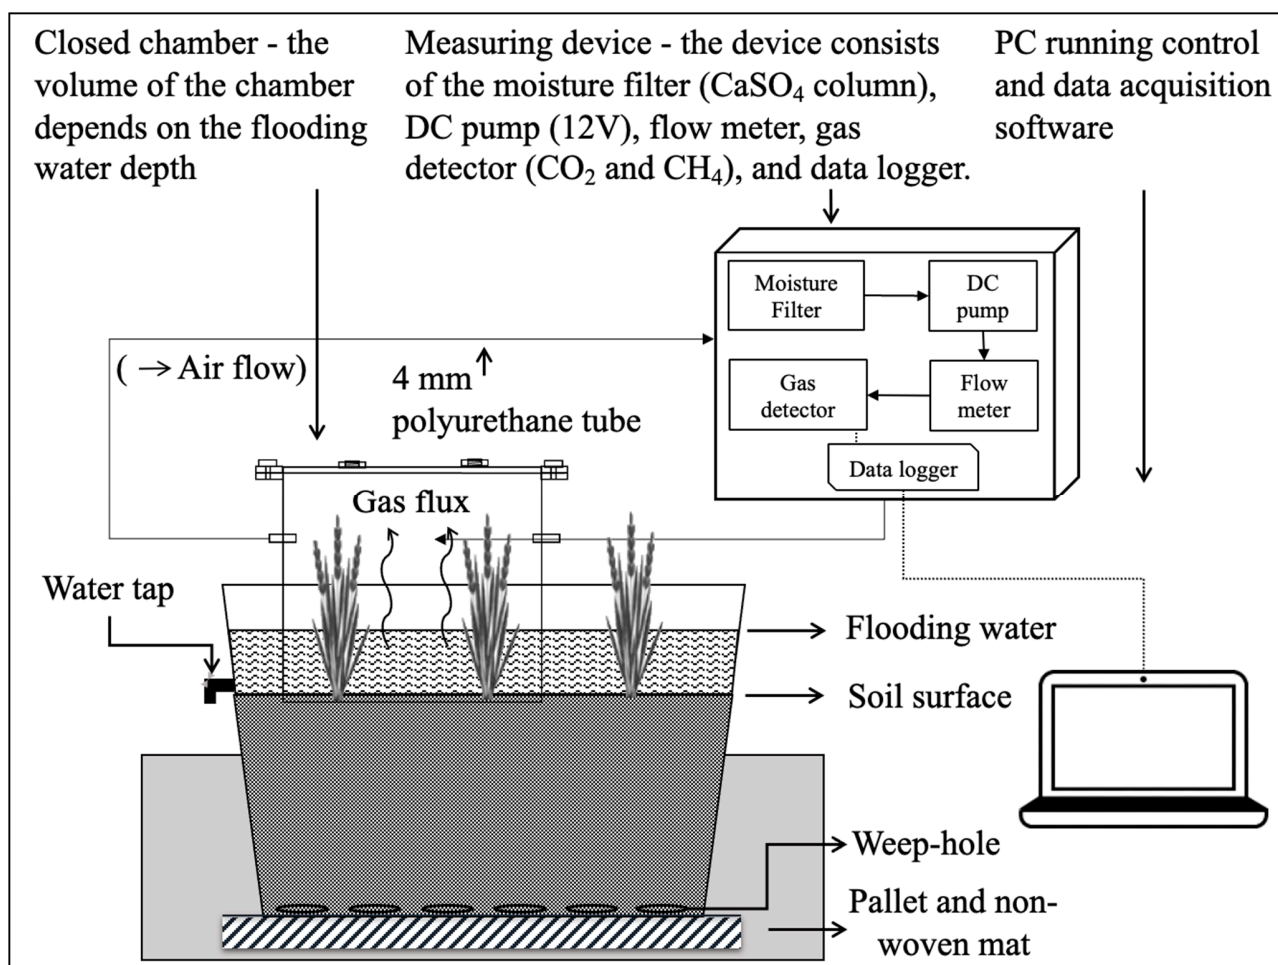

Note: The detector unit is composed of a CO<sub>2</sub> sensor (Soha-Tech, South Korea), with a detection range of 1 – 3,000  $\mu\text{mol mol}^{-1}$ , and a CH<sub>4</sub> sensor (Axetris, Switzerland), with a detection range of 1 – 100  $\mu\text{mol mol}^{-1}$ . Prior to the field measurements, the system was calibrated using CO<sub>2</sub> and CH<sub>4</sub> standard gas (N<sub>2</sub> balance, 11.0 MPa) at 500, 1000, and 2000  $\mu\text{mol mol}^{-1}$  for CO<sub>2</sub> and 5, 10, and 50  $\mu\text{mol mol}^{-1}$  for CH<sub>4</sub>. The coefficients of determination were 0.999 and 0.991 for the CO<sub>2</sub> and CH<sub>4</sub> calibration curves, respectively.

**Figure S1.**

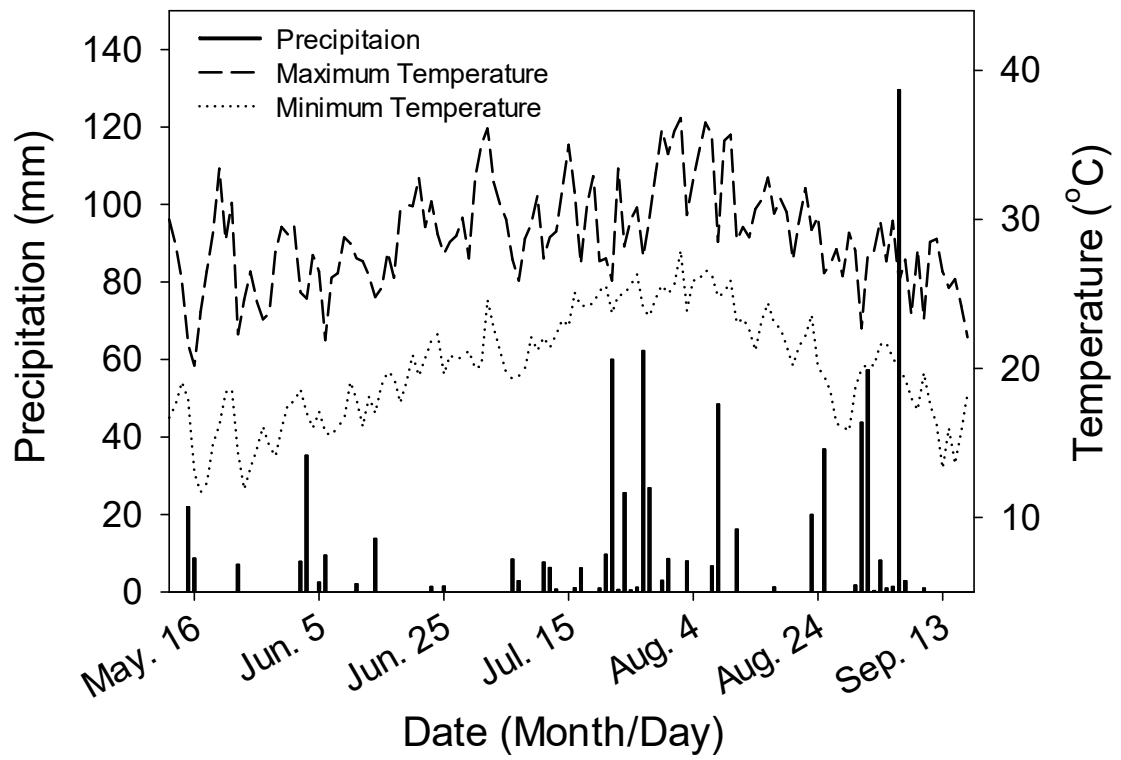

Figure S2.

# Eh-pH Diagram

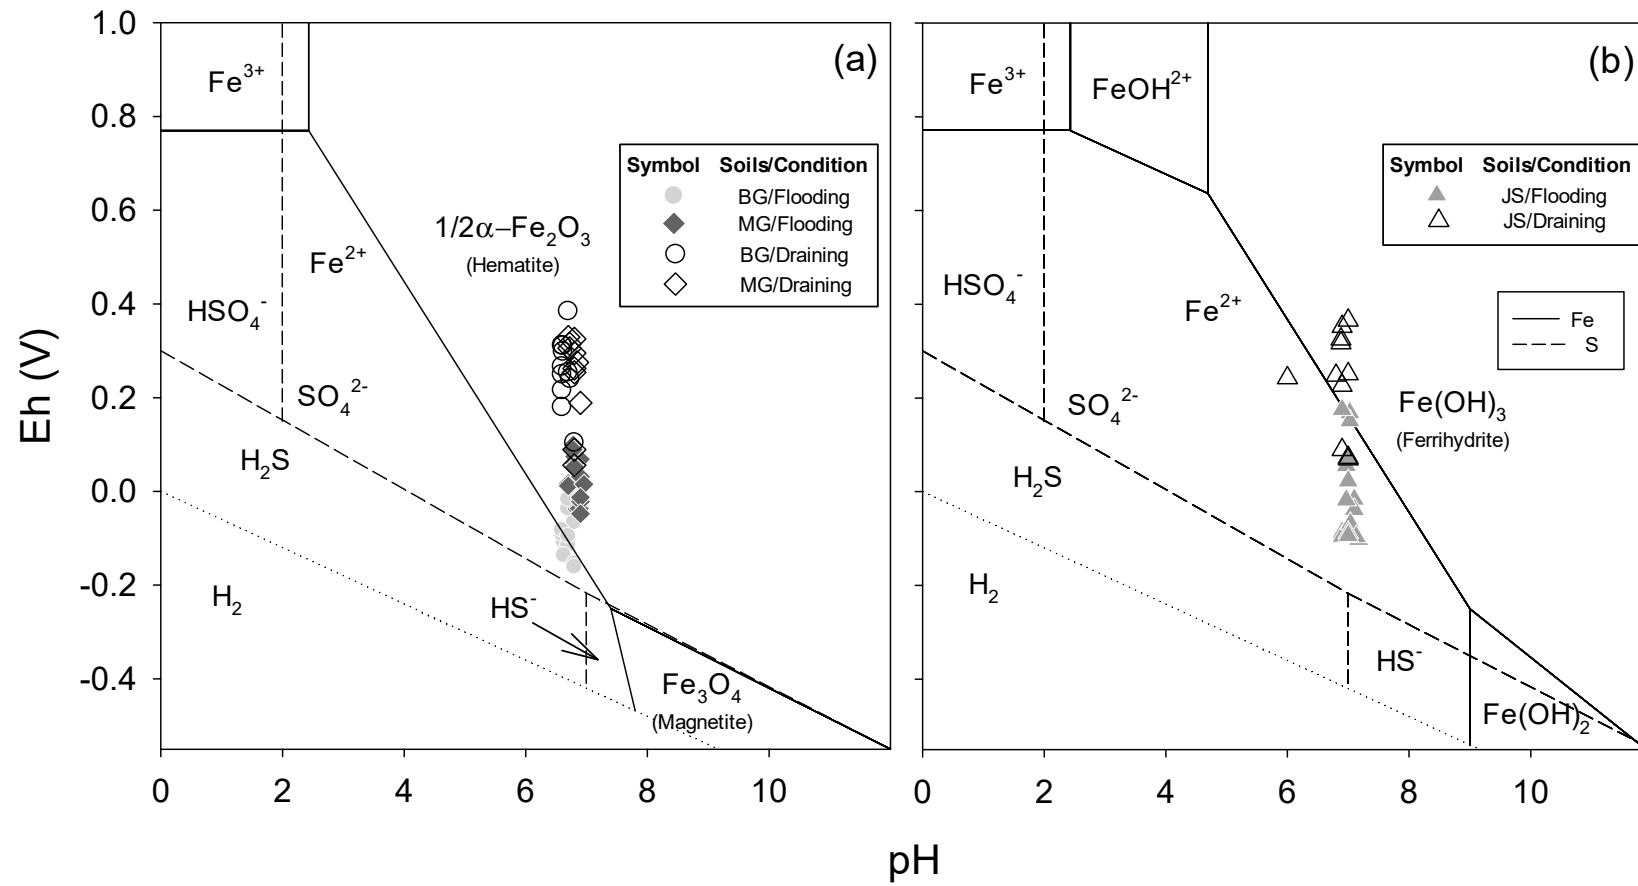

Figure S3

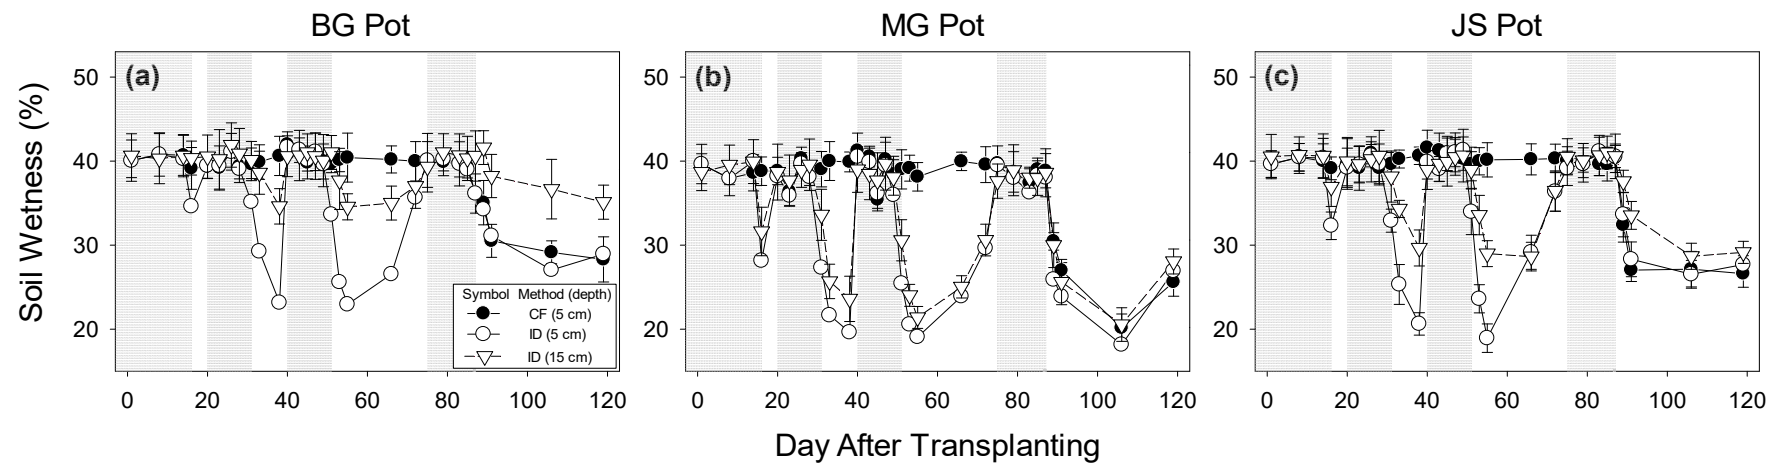

**Figure S4**
